# Supplementary material for: Deconstruction of a hypothalamic astrocyte-white adipocyte sympathetic axis that regulates lipolysis in mice
Source: PubMed Central journal article supplement (PMC9729228; doi:10.1038/s41467-022-35258-6), 2022-12-07

## Deconstruction of a hypothalamic astrocyte-white adipocyte axis for lipolysis

Dan Chen<sup>1,2+</sup>, Yong Qi<sup>2+</sup>, Jia Zhang<sup>1,2</sup>, & Yunlei Yang<sup>1,3,4,5\*</sup>

5

### Supplementary Fig. 1 Neurons were not transduced by GfaABC<sub>1</sub>D-dependent vectors.

10

Correlated to the text Figure 1, representative images of Alexa Fluor 488-conjugated anti-NSE antibody labeled neurons (green) and virally mCherry-transduced cells (red). No colocalizations of A488-labeled NSE neurons and mCherry-transduced astrocytes were observed. Scale bar, 20  $\mu$ m.

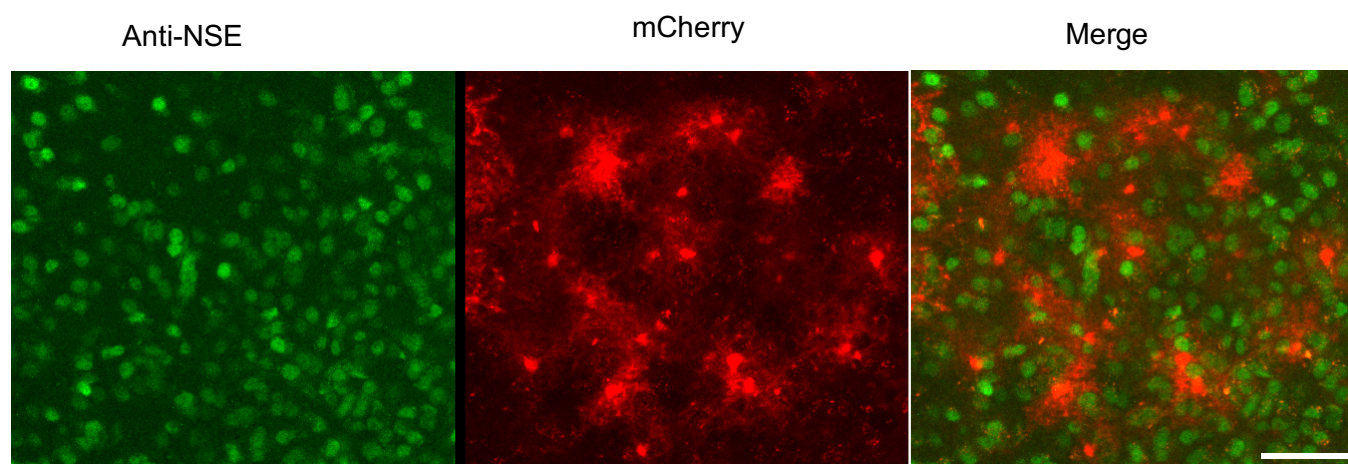

15

20

**Supplementary Fig. 2 Microglia were not transduced by GfaABC<sub>1</sub>D-dependent vectors.**

25 Correlated to the text Figure 1, representative images of Alexa fluor 488 anti-GFAP antibody-labelled cells (green), virally transduced mCherry-labelled cells (red), Alexa fluor 350 CD68 anti-CD68 antibody-labelled cells (blue) and colocalizations of the colors. No colocalizations of A350-labelled microglia and GFAP and mCherry-labeled cells were observed.

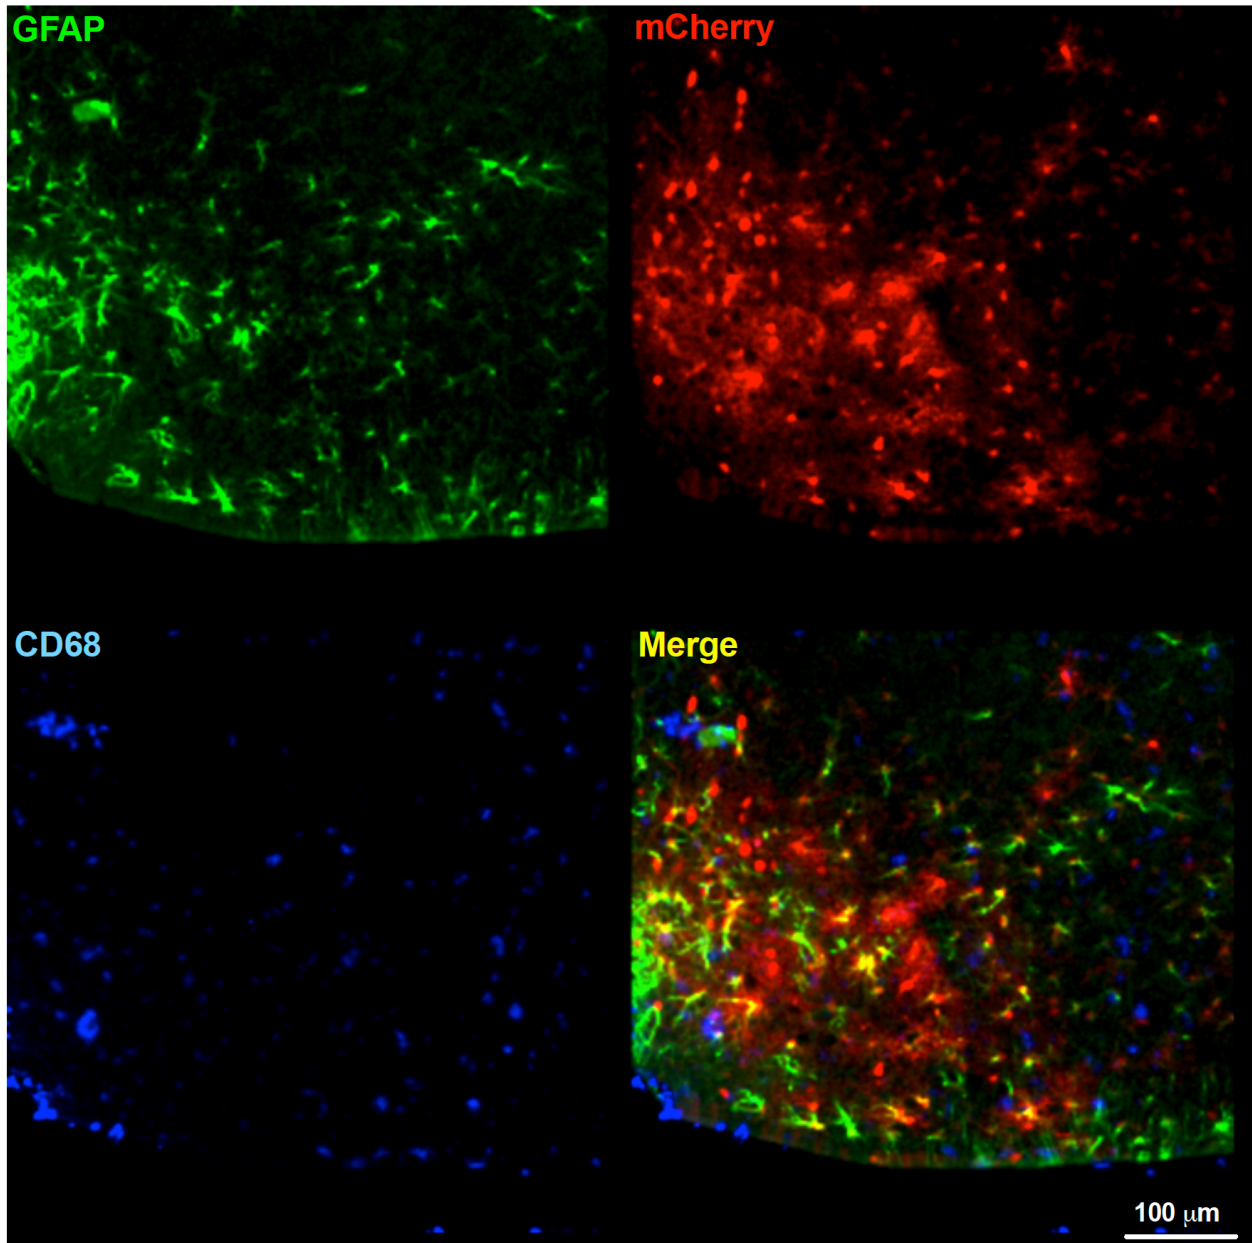

**Supplementary Fig. 3 Photometry evidence of chemogenetic stimulation of ARH astrocytes.**

**a** Schematic illustration of viral transductions of astrocytes with GfaABC<sub>1</sub>D-dependent hM3Dq and GCaMP<sub>6f</sub> and of in vivo calcium monitoring using fiber photometry. **b** A representative image of viral transfections in the ARH. **c** Representative images showing colocalizations of hM3Dq-mCherry (red) and GCaMP<sub>6f</sub> (green) in a selected region in the ARH. **d** Average GCaMP<sub>6f</sub> signaling recorded in the astrocyte hM3Dq-GCaMP<sub>6f</sub> co-transduced mice (n=6) receiving a single J60 i.p. injection. **e** Average GCaMP<sub>6f</sub> signaling recorded in the astrocyte hM3Dq-GCaMP<sub>6f</sub> co-transduced mice (n=4) receiving a single vehicle i.p. injection. **f** Average GCaMP<sub>6f</sub> signaling recorded in the astrocyte tdTomato-GCaMP<sub>6f</sub> co-transduced mice (n=6) receiving a single J60 i.p. injection. **g** Average GCaMP<sub>6f</sub> signaling recorded in the mice separately transduced with hM3Dq and GCaMP<sub>6f</sub> in the ARH astrocyte at the intervals of 10 days which received a single J60 i.p. injection (n=7). Scale bars for **b** 200  $\mu$ m and for **c** 50  $\mu$ m. Black arrows indicate i.p. injections of J60.

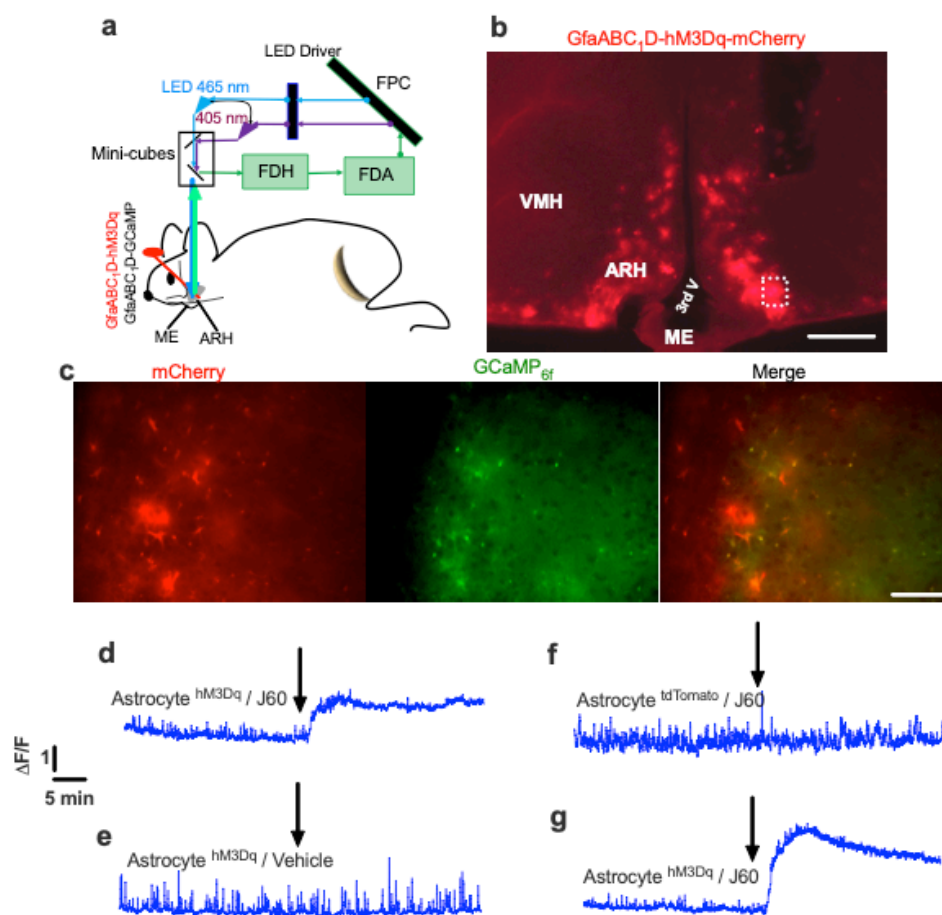

45

**Supplementary Fig. 4 Both cold challenge and astrocyte stimulation elevate iWAT NE contents.**

**a** Group data of average intensity of iWAT GRAB\_NE signals at ambient and cold (4 °C) temperature with vehicle (n=5) or  $\alpha$ MPT (n=7) treatment, related to the text Figure 1b. **b**, **c**

Group data of average intensity of iWAT GRAB\_NE signals in the astrocyte **b** hM3Dq-or **c** tdTomato transduced mice (n=8 per group) compared to baseline, respectively related to the text

50

Figure 2c and 2d. Two-way ANOVA with Sidak post hoc tests for **a**; two-tailed Student *t*-tests for **b** and **c** ( $p = 0.11$ ); data represent mean  $\pm$  s.e.m.; n.s. (Not significant).

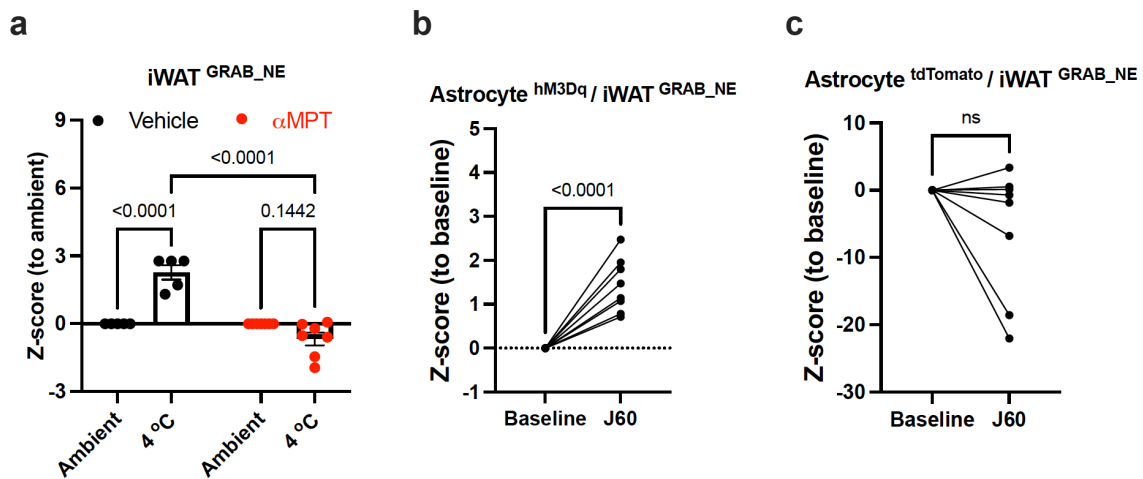

**Supplementary Fig. 5 GFAP104-dependent vectors did not transduce microglia and neurons.**

55 Correlated to the text Figure 3; **a** Representative image of transfections of GFAP104-ChR2-mCherry vectors in the ARH; **b** Representative images of anti-CD68-labeled microglial cells (blue) and Alexa Fluor 488-conjugated anti-GFAP antibody labeled astrocytes (green) and virally ChR2-mCherry transduced cells (red). Almost all the mCherry-labelled cells were colocalized with GFAP-labeled cells but not those CD68 cells. **c** Representative images of virally mCherry transduced cells (red) and Alexa Fluor 488-conjugated anti-NSE antibody labeled neurons (green) and virally ChR2-mCherry transduced cells (red). No colocalizations of A488-labeled NSE neurons and mCherry-transduced cells were observed. Scale bars for **a** 500  $\mu\text{m}$ , for **b** and **c** 10  $\mu\text{m}$ .

60

65

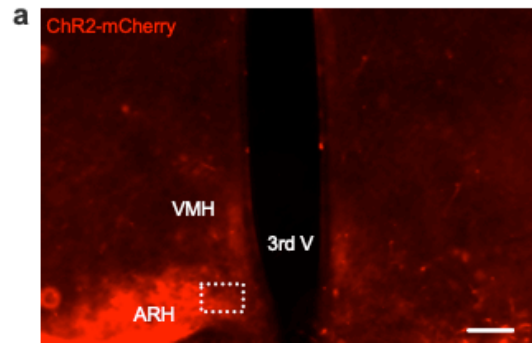

70

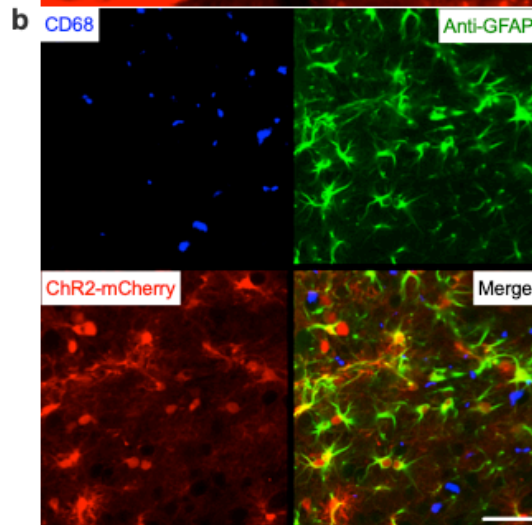

75

80

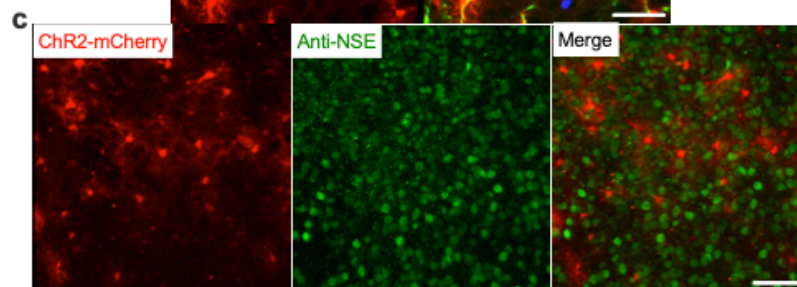

85

**Supplementary Fig. 6 Morphological evidence of Chr2-mCherry expressions in T<sub>13</sub> PG.**

Correlated to the text Figure 4e-i; **a** Representative image of GCaMP<sub>6f</sub> -positive neurons (green) and Cre-dependent expressions of Chr2-mCherry (red) in the virally injected T<sub>13</sub> PG in dual TH-Cre GCaMP<sub>6f</sub> mice; **b** Representative images of GCaMP<sub>6f</sub> and mCherry expressions in iWAT in the same mice. Scale bars for **a** and **b** 50  $\mu$ m.

90

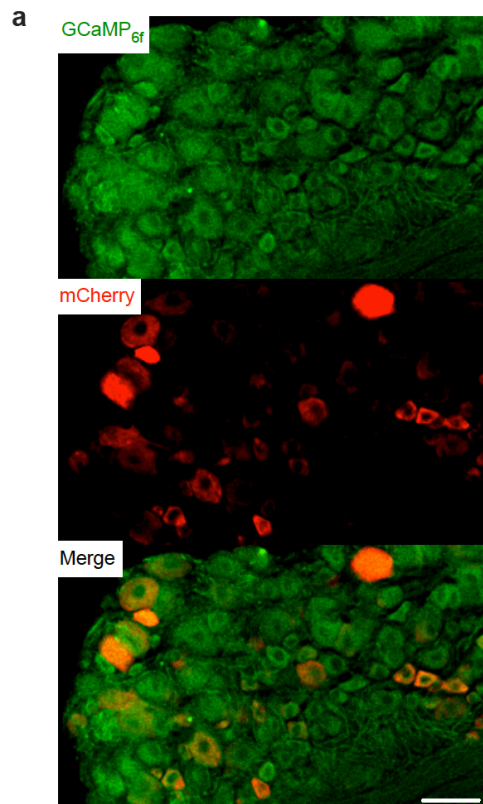

95

100

105

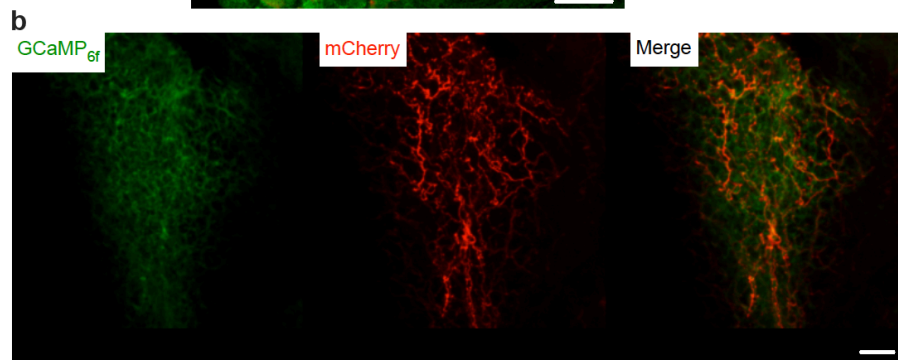

110

115

**Supplementary Fig. 7 Astrocyte stimulation did not affect lipolytic and thermogenic gene expressions.** **a** Group data of iWAT mRNA expressions of HSL and ATGL in the ARH astrocyte hM3Dq or tdTomato-transduced mice (n=6 per group), which received a single i.p. injection of J60 2 h before extracting the iWAT. **b** Group data of iWAT browning and thermogenic markers from the same mice. Two-tailed student *t*-tests; data represent mean  $\pm$  s.e.m.; n.s. (Not significant).

120

125

130

135

140

145

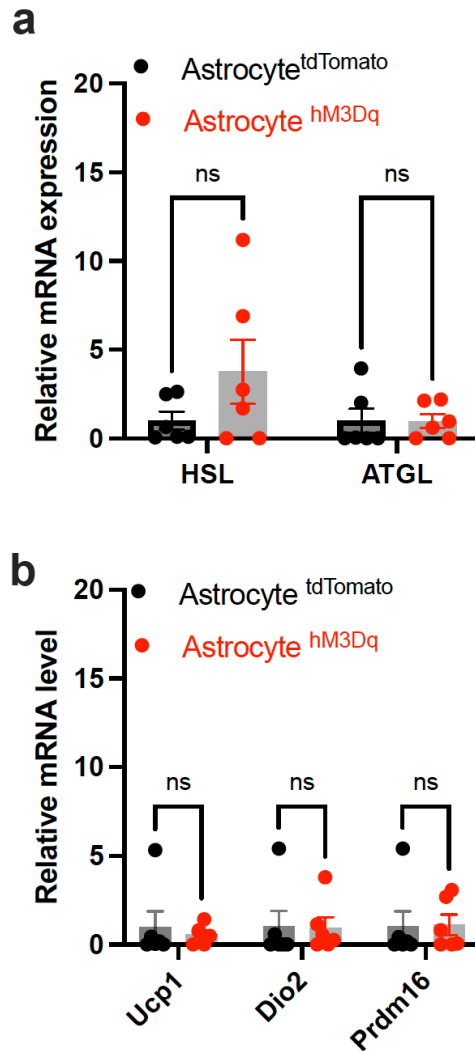

**Supplementary Fig. 8 POMC neuron inhibition blunts astrocyte increasing the firing rates**

**of local sympathetic inputs to iWAT.** Group data of the electrical signals recorded on sympathetic inputs to iWAT in ARH astrocyte hM3Dq POMC neuron mCherry (n=7), astrocyte tdTomato POMC neuron hM4Di (n=8), or astrocyte hM3Dq POMC neuron hM4Di (n=7)-transduced POMC-Cre mice. Astrocytes were virally transduced with GfaABC<sub>1</sub>D-dependent vectors and POMC neurons were transduced with Cre-dependent vectors in POMC-Cre mice. Mice were kept in a lightly sedated state. The nerves were placed on the recording electrodes as stated in the methods. Two-way ANOVA with Sidak post hoc tests; data represent mean  $\pm$  s.e.m.;

\*\*  $p = 0.0017 < 0.01$ ; \*\*\*  $p = 0.0008 < 0.001$ ; \*\*\*\*  $p < 0.0001$ .

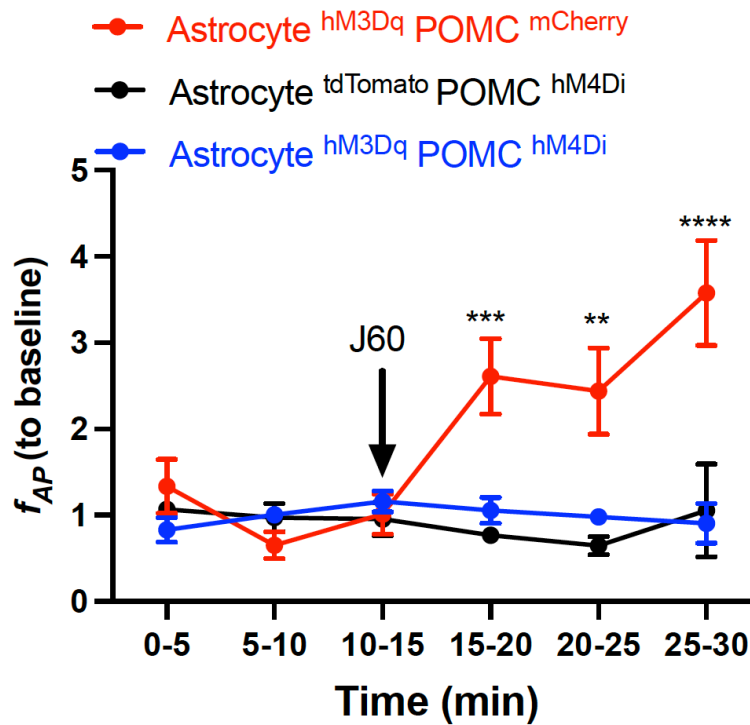



**Supplementary Fig. 9 Chemogenetic inhibition of POMC neurons blunts the astrocyte stimulation-induced phosphorylation of HSL.**

**a** Western blots of p-HSL (Ser660), HSL and actin in extracted iWATs from the ARH astrocyte tdTomato POMC neuron mCherry, astrocyte hM3Dq POMC neuron mCherry, or astrocyte hM3Dq POMC neuron hM4Di-transduced mice. Mice were treated with J60 via i.p. two h before extracting the iWAT for western blot assays. **b** Group data of p-HSL over HSL (n=3 per group). Astrocytes were virally transduced with GfaABC<sub>1</sub>D-dependent vectors and POMC neurons were transduced with Cre-dependent vectors in POMC-Cre mice. One-way ANOVA; data represent mean  $\pm$  s.e.m.; \*  $p = 0.02 < 0.05$ .

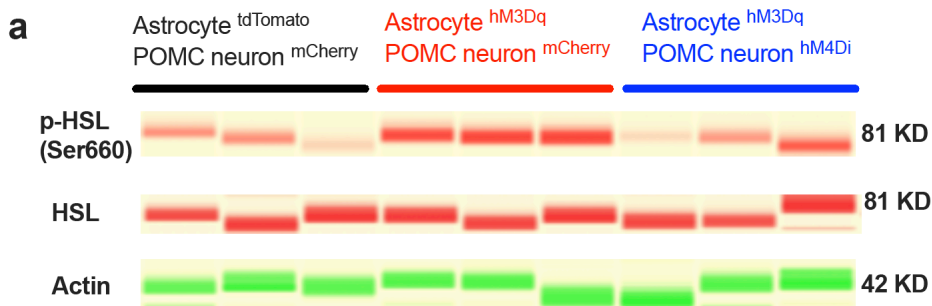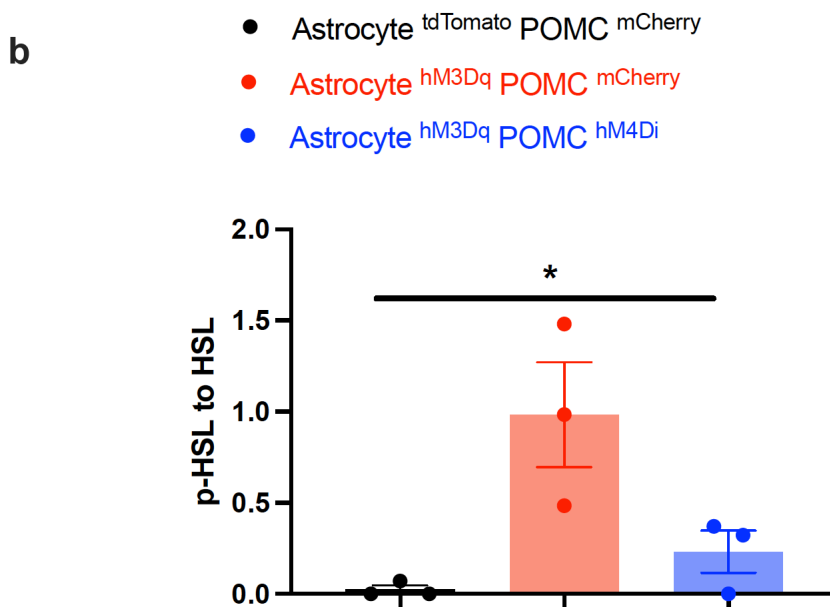

**Supplementary Fig. 10 Viral transduction efficiency.**

Group data of the total number of virally transduced ARH astrocytes of each animal in the representative hM3Dq (n=5) or ChR2 (n=4) transduced mice. Data represent mean  $\pm$  s.e.m.

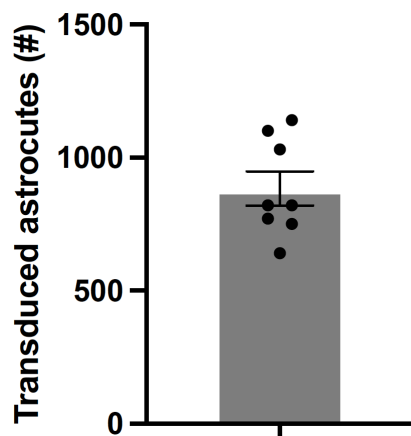

Source data of Supplementary Fig. 9a.

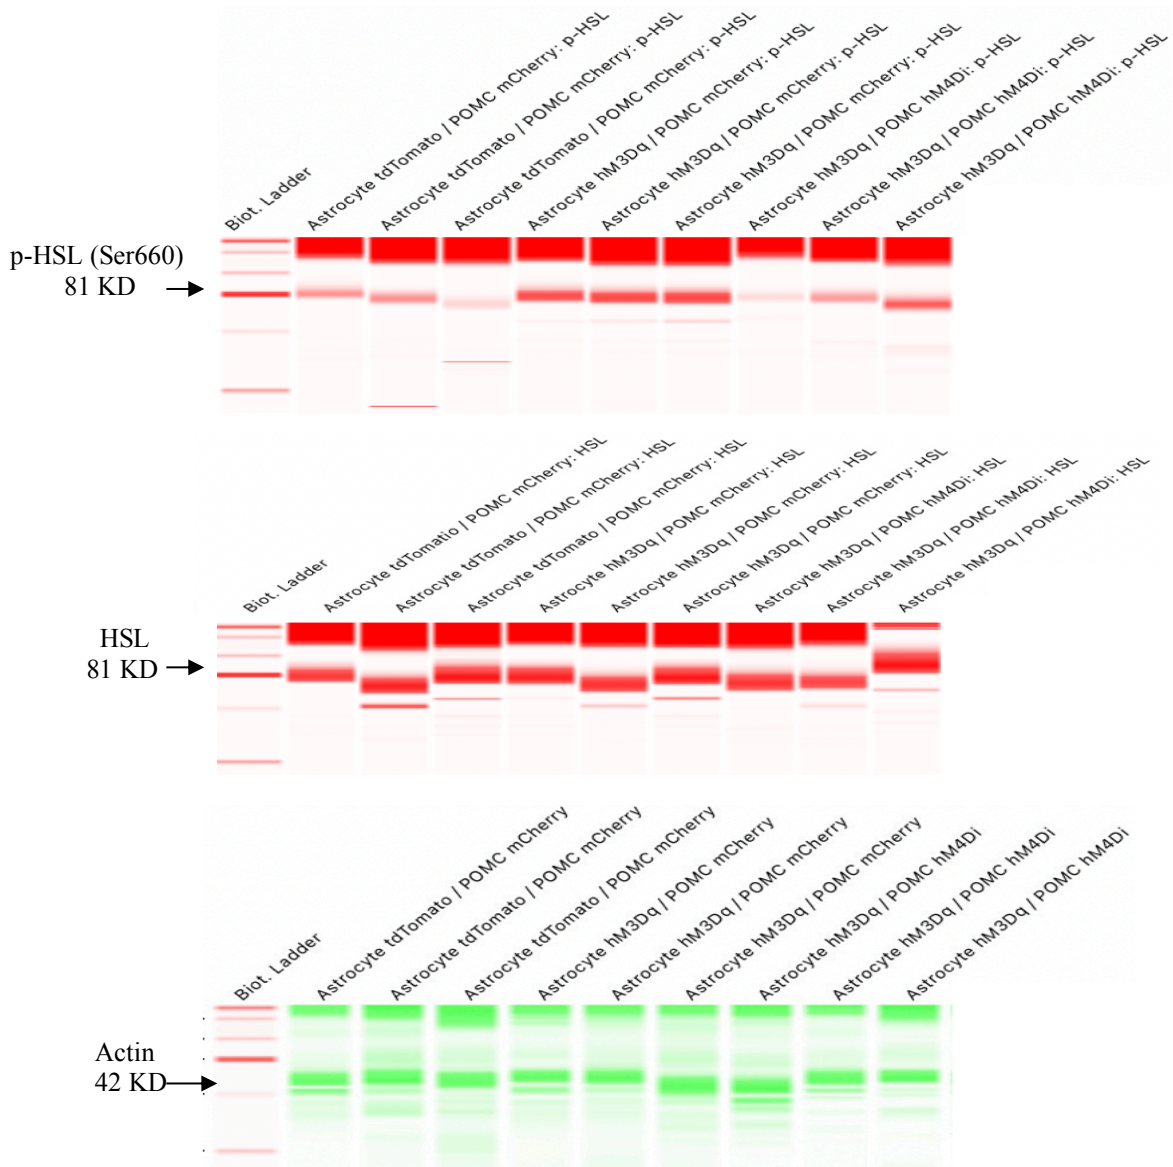

Supplement: 41467_2022_35258_MOESM1_ESM.pdf [file 41467_2022_35258_MOESM1_ESM.pdf]
